# Supplementary material for: Diagnosis- and Prognosis-Related Gene Alterations in BCR::ABL1-Negative Myeloproliferative Neoplasms
Source: MDPI journal article supplement (doi:10.3390/ijms241613008), 2023-08-21
Supplement: s1 [file s1]

**Supplementary Table S1. List of reported JAK2 exon 12 mutations.\***

| Position in AA | CDS Mutation         | AA Mutation               | COSMIC ID   | Type                            |
|----------------|----------------------|---------------------------|-------------|---------------------------------|
| 521            | c.1562C>T            | p.P521L                   | COSM9413096 | Substitution - Missense         |
| 533            | c.1597A>G            | p.N533D                   | COSM1462558 | Substitution - Missense         |
| 535            | c.1605G>C            | p.M535I                   | COSM4385850 | Substitution - Missense         |
| 536            | c.1606_1638dup       | p.V536_I546dup            | COSM27274   | Insertion - In frame            |
| 537            | c.1609T>A            | p.F537I                   | COSM219800  | Substitution - Missense         |
| 537            | c.1609_1641dup       | p.F537_F547dup            | COSM33705   | Insertion - In frame            |
| 537            | c.1611_1616del       | p.F537_K539delinsL        | COSM24437   | Deletion - In frame             |
| 537            | c.?                  | p.F537I                   | COSM28699   | Substitution - Missense         |
| 537            | c.?                  | p.F537L                   | COSM4385852 | Substitution - Missense         |
| 537            | c.?                  | p.F537_I540>LV            | COSM405280  | Complex - Deletion - In frame   |
| 537            | c.?                  | p.F537_K539delinsL        | COSM29884   | Deletion - In frame             |
| 538            | c.1612C>T            | p.H538Y                   | COSM1462563 | Substitution - Missense         |
| 538            | c.1614_1616del       | p.H538_K539delinsQ        | COSM1757323 | Deletion - In frame             |
| 538            | c.1614_1616delinsATT | p.H538_K539delinsQL       | COSM24438   | Substitution - Missense         |
| 538            | c.1614_1616delinsGTT | p.H538_K539delinsQL       | COSM28694   | Substitution - Missense         |
| 538            | c.?                  | p.H538Q                   | COSM166358  | Substitution - Missense         |
| 538            | c.?                  | p.H538_I540>DLS           | COSM29883   | Complex - compound substitution |
| 538            | c.?                  | p.H538_K539del            | COSM29882   | Deletion - In frame             |
| 538            | c.?                  | p.H538_K539delinsQL       | COSM29885   | Substitution - Missense         |
| 539            | c.1614_1616delinsTTT | p.K539L                   | COSM9413097 | Substitution - Missense         |
| 539            | c.1615A>G            | p.K539E                   | COSM30808   | Substitution - Missense         |
| 539            | c.1615A>T            | p.K539*                   | COSM1757325 | Substitution - Nonsense         |
| 539            | c.1615_1616inv       | p.K539L                   | COSM24439   | Substitution - Missense         |
| 539            | c.1616A>T            | p.K539I                   | COSM219801  | Substitution - Missense         |
| 539            | c.?                  | p.K539I                   | COSM4166523 | Substitution - Missense         |
| 539            | c.?                  | p.K539L                   | COSM28639   | Substitution - Missense         |
| 540            | c.1619T>C            | p.I540T                   | COSM219805  | Substitution - Missense         |
| 540            | c.1620_1621del       | p.I540Mfs*3               | COSM219802  | Deletion - Frameshift           |
| 541            | c.1622_1627del       | p.R541_E543delinsK        | COSM26735   | Deletion - In frame             |
| 541            | c.?                  | p.R541_E543delinsK        | COSM29889   | Deletion - In frame             |
| 542            | c.1624_1629del       | p.N542_E543del            | COSM24440   | Deletion - In frame             |
| 542            | c.1626_1629del       | p.N542Kfs*3               | COSM219803  | Deletion - Frameshift           |
| 542            | c.?                  | p.N542_E543del            | COSM29886   | Deletion - In frame             |
| 543            | c.1627_1632del       | p.E543_D544del            | COSM27090   | Deletion - In frame             |
| 543            | c.?                  | p.E543_D544del            | COSM29481   | Deletion - In frame             |
| 544            | c.1631A>G            | p.D544G                   | COSM30805   | Substitution - Missense         |
| 544            | c.?                  | p.D544_L545del            | COSM29880   | Deletion - In frame             |
| 545            | c.1634T>C            | p.L545S                   | COSM30807   | Substitution - Missense         |
| 546            | c.?                  | p.I546_F547ins11          | COSM405279  | Insertion - In frame            |
| 547            | c.1608_1640dup       | p.I546_F547insLFHKIRNEDLI | COSM27275   | Insertion - In frame            |
| 547            | c.?                  | p.F547_N548ins12          | COSM29881   | Insertion - In frame            |
| 547            | c.?                  | p.F547_N548insHKIRNEDLIL  | COSM4385847 | Insertion - In frame            |

\* Mutations were extracted from the Catalogue Of Somatic Mutations In Cancer (COSMIC) and the positions of mutations were expressed in accordance with the accession No. NM\_004972.3. Sorting was conducted under the following conditions: Tissue; Hematopoietic neoplasm and Polycythemia vera, Somatic status; Confirmed somatic and Variant of unknown origin, and Sample type; Tumor sample. Silent mutations were removed from the list.

**Supplementary Table S2. List of reported *CALR* frameshift mutations in ET.\***

| Position in AA | CDS Mutation                        | AA Mutation  | COSMIC ID    | Type                   |
|----------------|-------------------------------------|--------------|--------------|------------------------|
| 361            | c.1080_1143delinsGGAAGAAGACAA       | p.Q361Efs*52 | COSM6022232  | Complex - frameshift   |
| 363            | c.1088_1089insTTGTC                 | p.E363Dfs*69 | COSM5985671  | Insertion - Frameshift |
| 363            | c.1088delinsTTTGTC                  | p.E363Vfs*69 | COSM5985668  | Complex - frameshift   |
| 364            | c.1089_1141del                      | p.E364Gfs*7  | COSM5985674  | Deletion - Frameshift  |
| 364            | c.1090_1123del                      | p.E364Nfs*55 | COSM3734989  | Deletion - Frameshift  |
| 364            | c.1090_1141del                      | p.E364Rfs*49 | COSM5885137  | Deletion - Frameshift  |
| 364            | c.1091_1142del                      | p.E364Gfs*49 | COSM1738057  | Deletion - Frameshift  |
| 364            | c.1092_1125del                      | p.E364Dfs*55 | COSM1738333  | Deletion - Frameshift  |
| 364            | c.1092_1140delinsCCA                | p.E364Dfs*51 | COSM3355743  | Complex - frameshift   |
| 365            | c.1093_1138del                      | p.Q365Rfs*50 | COSM3734990  | Deletion - Frameshift  |
| 365            | c.1094_1139del                      | p.Q365Rfs*50 | COSM1738152  | Deletion - Frameshift  |
| 366            | c.1097_1130del                      | p.R366Kfs*53 | COSM1738357  | Deletion - Frameshift  |
| 367            | c.1099_1135del                      | p.L367Rfs*51 | COSM10127809 | Deletion - Frameshift  |
| 367            | c.1099_1141del                      | p.L367Rfs*49 | COSM5885131  | Deletion - Frameshift  |
| 367            | c.1099_1150del                      | p.L367Tfs*46 | COSM1738055  | Deletion - Frameshift  |
| 367            | c.1099_1153delinsAGG                | p.L367Rfs*46 | COSM5885139  | Complex - frameshift   |
| 367            | c.1099_1156del                      | p.L367Rfs*44 | COSM5885963  | Deletion - Frameshift  |
| 367            | c.1100_1133del                      | p.L367Rfs*52 | COSM4745937  | Deletion - Frameshift  |
| 367            | c.1100_1134delinsA                  | p.L367Qfs*52 | COSM1738339  | Complex - frameshift   |
| 367            | c.1100_1136delinsGGAGGT             | p.L367Rfs*53 | COSM5885968  | Complex - frameshift   |
| 367            | c.1100_1145del                      | p.L367Qfs*48 | COSM1738150  | Deletion - Frameshift  |
| 367            | c.1100_1152del                      | p.L367Qfs*4  | COSM9565933  | Deletion - Frameshift  |
| 367            | c.?                                 | p.L367Qfs*?  | COSM5574296  | Deletion - Frameshift  |
| 367            | c.?                                 | p.L367Xfs*46 | COSM3355748  | Deletion - Frameshift  |
| 368            | c.1101_1134del                      | p.K368Rfs*51 | COSM1738368  | Deletion - Frameshift  |
| 368            | c.1101_1146del                      | p.K368Rfs*47 | COSM5885962  | Deletion - Frameshift  |
| 368            | c.1101_1152del                      | p.K368Rfs*45 | COSM1738334  | Deletion - Frameshift  |
| 368            | c.1101_1161del                      | p.K368Mfs*42 | COSM1738360  | Deletion - Frameshift  |
| 368            | c.1102_1137delinsCA                 | p.K368Qfs*51 | COSM1738157  | Complex - frameshift   |
| 368            | c.1103_1139del                      | p.K368Rfs*50 | COSM5885104  | Deletion - Frameshift  |
| 368            | c.1103_1148del                      | p.K368Rfs*47 | COSM3355766  | Deletion - Frameshift  |
| 368            | c.1103_1154del                      | p.K368Rfs*45 | COSM1738343  | Deletion - Frameshift  |
| 369            | c.1105_1138del                      | p.E369Rfs*50 | COSM1738153  | Deletion - Frameshift  |
| 369            | c.1105_1147delinsAGGAGGCAA          | p.E369Rfs*50 | COSM5885974  | Complex - frameshift   |
| 369            | c.1105_1156del                      | p.E369Rfs*44 | COSM1738158  | Deletion - Frameshift  |
| 370            | c.1108_1138del                      | p.E370Rfs*50 | COSM5731855  | Deletion - Frameshift  |
| 370            | c.1108_1141del                      | p.E370Rfs*49 | COSM3733223  | Deletion - Frameshift  |
| 370            | c.1108_1177del                      | p.E370Rfs*37 | COSM1738364  | Deletion - Frameshift  |
| 370            | c.1109_1160del                      | p.E370Vfs*43 | COSM6022228  | Deletion - Frameshift  |
| 371            | c.1111_1141del                      | p.E371Rfs*49 | COSM1738349  | Deletion - Frameshift  |
| 371            | c.1111_1142delinsT                  | p.E371Wfs*49 | COSM5731860  | Complex - frameshift   |
| 371            | c.1111_1147del                      | p.E371Rfs*47 | COSM1738335  | Deletion - Frameshift  |
| 371            | c.1111_1150delinsTCA                | p.E371Sfs*47 | COSM9114826  | Complex - frameshift   |
| 372            | c.1113_1143del                      | p.E372Qfs*48 | COSM10127811 | Deletion - Frameshift  |
| 372            | c.1114_1144del                      | p.E372Qfs*48 | COSM3734991  | Deletion - Frameshift  |
| 372            | c.1115_1139del                      | p.E372Gfs*50 | COSM10127812 | Deletion - Frameshift  |
| 373            | c.1116_1146del                      | p.D373Rfs*47 | COSM2704902  | Deletion - Frameshift  |
| 373            | c.1118_1127del                      | p.D373Afs*54 | COSM10127813 | Deletion - Frameshift  |
| 373            | c.1118_1136del                      | p.D373Gfs*51 | COSM1738159  | Deletion - Frameshift  |
| 373            | c.1118_1145delinsCGTTTA             | p.D373Afs*50 | COSM1738160  | Complex - frameshift   |
| 374            | c.1120_1125delinsTCTTGCTCT          | p.K374Sfs*57 | COSM5703410  | Complex - frameshift   |
| 374            | c.1120_1126delinsTTCTTGCTTCTTGCTCTT | p.K374Ffs*60 | COSM5985670  | Complex - frameshift   |
| 374            | c.1120_1131delinsTGCGT              | p.K374Cfs*54 | COSM1738344  | Complex - frameshift   |
| 374            | c.1120_1140delinsTCTTGCTCT          | p.K374Sfs*52 | COSM5885136  | Complex - frameshift   |
| 374            | c.1121_1139del                      | p.K374Rfs*50 | COSM1738345  | Deletion - Frameshift  |
| 374            | c.1121_1142del                      | p.K374Rfs*49 | COSM9114827  | Deletion - Frameshift  |
| 374            | c.1121_1148del                      | p.K374Rfs*47 | COSM3734992  | Deletion - Frameshift  |
| 374            | c.1122_1123delinsTTGT               | p.K374Nfs*57 | COSM5703409  | Complex - frameshift   |
| 374            | c.1122_1125del                      | p.K374Nfs*55 | COSM1738328  | Deletion - Frameshift  |
| 375            | c.1122_1141delinsA                  | p.K375Rfs*49 | COSM1738346  | Complex - frameshift   |
| 375            | c.1122del                           | p.K375Nfs*55 | COSM1738350  | Deletion - Frameshift  |
| 375            | c.1123_1125delinsTGTTT              | p.K375Cfs*56 | COSM1738351  | Complex - frameshift   |
| 375            | c.1123_1125delinsTTTTGTTT           | p.K375Ffs*57 | COSM5885965  | Complex - frameshift   |
| 375            | c.1124_1133del                      | p.K375Rfs*52 | COSM1738366  | Deletion - Frameshift  |

|     |                               |              |              |                        |
|-----|-------------------------------|--------------|--------------|------------------------|
| 375 | c.1124_1136del                | p.K375Rfs*51 | COSM6022233  | Deletion - Frameshift  |
| 375 | c.1124_1142del                | p.K375Rfs*49 | COSM1738337  | Deletion - Frameshift  |
| 376 | c.1125_1126insTTCTTAGTGCT     | p.R376Ffs*58 | COSM6022230  | Insertion - Frameshift |
| 376 | c.1126_1131delinsTGCGT        | p.R376Cfs*54 | COSM5985672  | Complex - frameshift   |
| 376 | c.1126_1148del                | p.R376Gfs*5  | COSM6852891  | Deletion - Frameshift  |
| 376 | c.1127_1132delinsTTTGC        | p.R376Lfs*54 | COSM5885105  | Complex - frameshift   |
| 376 | c.1127_1145del                | p.R376Qfs*48 | COSM4745934  | Deletion - Frameshift  |
| 377 | c.1125_1146del                | p.K377Tfs*46 | COSM3734993  | Deletion - Frameshift  |
| 377 | c.1129_1139delinsCTCTGCCTCC   | p.K377Lfs*53 | COSM5037722  | Complex - frameshift   |
| 377 | c.1129_1139delinsCTCTGTC      | p.K377Lfs*52 | COSM5037721  | Complex - frameshift   |
| 377 | c.1130_1154delinsTCCATCCTTGTC | p.K377Lfs*49 | COSM5885106  | Complex - frameshift   |
| 378 | c.1132_1153del                | p.E378Rfs*45 | COSM1738329  | Deletion - Frameshift  |
| 379 | c.1135del                     | p.E379Rfs*51 | COSM9285102  | Deletion - Frameshift  |
| 380 | c.1136_1137dup                | p.E380Rfs*51 | COSM4387491  | Insertion - Frameshift |
| 380 | c.1139_1140insTC              | p.E380Dfs*51 | COSM3355767  | Insertion - Frameshift |
| 380 | c.1139del                     | p.E380Gfs*50 | COSM5885111  | Deletion - Frameshift  |
| 381 | c.1141del                     | p.E381Rfs*49 | COSM1738154  | Deletion - Frameshift  |
| 381 | c.1142_1151delinsCGGCATGTC    | p.E381Afs*49 | COSM5703411  | Complex - frameshift   |
| 381 | c.1143_1154delinsTCCTTGTC     | p.E381Dfs*48 | COSM1738362  | Complex - frameshift   |
| 383 | c.1145_1146insGACGC           | p.E383Tfs*49 | COSM5703408  | Insertion - Frameshift |
| 383 | c.1147_1151del                | p.E383Qfs*4  | COSM9180538  | Deletion - Frameshift  |
| 383 | c.1147_1154delinsTGTC         | p.E383Cfs*46 | COSM5037719  | Complex - frameshift   |
| 383 | c.1148_1149insTCCTTGTC        | p.E383Dfs*50 | COSM5885135  | Insertion - Frameshift |
| 383 | c.1148_1154delinsGAC          | p.E383Gfs*46 | COSM4745936  | Complex - frameshift   |
| 384 | c.1145_1149dup                | p.D384Qfs*48 | COSM9180539  | Insertion - Frameshift |
| 384 | c.1150_1151ins52              | p.D384fs*?   | COSM5715393  | Insertion - Frameshift |
| 384 | c.1150_1154delinsTGTC         | p.D384Cfs*46 | COSM6022229  | Complex - frameshift   |
| 384 | c.1151_1154del                | p.D384Gfs*45 | COSM10127810 | Deletion - Frameshift  |
| 384 | c.1151_1154delinsGCAATTGTC    | p.D384Gfs*48 | COSM3355746  | Complex - frameshift   |
| 384 | c.1151_1154delinsTTTGTC       | p.D384Vfs*47 | COSM5037720  | Complex - frameshift   |
| 385 | c.1151_1152insTTGTC           | p.K385Cfs*47 | COSM9565929  | Insertion - Frameshift |
| 385 | c.1153_1154delinsTCTTGTC      | p.K385Sfs*47 | COSM1738365  | Complex - frameshift   |
| 385 | c.1153_1154delinsTGTC         | p.K385Cfs*46 | COSM1738330  | Complex - frameshift   |
| 385 | c.1153_1154insTCTGT           | p.K385Ifs*47 | COSM4745935  | Insertion - Frameshift |
| 385 | c.1154_1155insTTGTC           | p.K385Nfs*47 | COSM1738056  | Insertion - Frameshift |
| 385 | c.1154del                     | p.K385Rfs*45 | COSM9180541  | Deletion - Frameshift  |
| 385 | c.1154delinsCTTGTC            | p.K385Tfs*47 | COSM1738331  | Complex - frameshift   |
| 385 | c.1154delinsGTTGTC            | p.K385Sfs*47 | COSM9311652  | Complex - frameshift   |
| 385 | c.1154delinsTATGTC            | p.K385Ifs*47 | COSM5985669  | Complex - frameshift   |
| 385 | c.1154delinsTCTGTC            | p.K385Ifs*47 | COSM3734994  | Complex - frameshift   |
| 385 | c.1154delinsTGTGTC            | p.K385Mfs*47 | COSM1738155  | Complex - frameshift   |
| 385 | c.1154delinsTTTATC            | p.K385Ifs*47 | COSM9311653  | Complex - frameshift   |
| 385 | c.?                           | p.K385Xfs*47 | COSM3355749  | Insertion - Frameshift |
| 386 | c.1154_1155insATGTC           | p.E386Cfs*46 | COSM1738355  | Insertion - Frameshift |
| 386 | c.1155_1156insTGTGCG          | p.E386Cfs*46 | COSM1738332  | Insertion - Frameshift |
| 387 | c.1153_1157dup                | p.D387Rfs*45 | COSM5885138  | Insertion - Frameshift |
| 388 | c.1162del                     | p.D388Mfs*42 | COSM9226088  | Deletion - Frameshift  |
| 404 | c.1211_1217del                | p.D404Gfs*24 | COSM5574343  | Deletion - Frameshift  |
| 405 | c.1214del                     | p.E405Gfs*25 | COSM5753346  | Deletion - Frameshift  |
| 408 | c.1221del                     | p.D408Mfs*22 | COSM9565932  | Deletion - Frameshift  |

\* Mutations were extracted from the Catalogue Of Somatic Mutations In Cancer (COSMIC) and the positions of mutations were expressed in accordance with the accession No. NM\_004343.3. Sorting was conducted under the following conditions: Tissue; Hematopoietic neoplasm and Essential thrombocythemia, Somatic status; Confirmed somatic and Variant of unknown origin, and Sample type; Tumor sample. Only frameshift mutations are shown in this list.

**Supplementary Table S3. List of reported *CALR* frameshift mutations in MF.\***

| Position in AA | CDS Mutation                                                                                  | AA Mutation  | COSMIC ID    | Type                   |
|----------------|-----------------------------------------------------------------------------------------------|--------------|--------------|------------------------|
| 363            | c.1088_1089insTTGTC                                                                           | p.E363Dfs*69 | COSM5985671  | Insertion - Frameshift |
| 364            | c.1090_1123del                                                                                | p.E364Nfs*55 | COSM3734989  | Deletion - Frameshift  |
| 364            | c.1091_1142del                                                                                | p.E364Gfs*49 | COSM1738057  | Deletion - Frameshift  |
| 365            | c.1093_1138del                                                                                | p.Q365Rfs*50 | COSM3734990  | Deletion - Frameshift  |
| 367            | c.1099_1101delinsAC                                                                           | p.L367Tfs*63 | COSM9264988  | Complex - frameshift   |
| 367            | c.1099_1132del                                                                                | p.L367Rfs*52 | COSM1738359  | Deletion - Frameshift  |
| 367            | c.1099_1150del                                                                                | p.L367Tfs*46 | COSM1738055  | Deletion - Frameshift  |
| 367            | c.1100_1145del                                                                                | p.L367Qfs*48 | COSM1738150  | Deletion - Frameshift  |
| 368            | c.1102_1137delinsGA                                                                           | p.K368Efs*51 | COSM3355754  | Complex - frameshift   |
| 368            | c.1103_1136del                                                                                | p.K368Rfs*51 | COSM1738151  | Deletion - Frameshift  |
| 368            | c.1103_1145delinsGGAGGAGGG                                                                    | p.K368Rfs*51 | COSM3355744  | Complex - frameshift   |
| 368            | c.1103_1148del                                                                                | p.K368Rfs*47 | COSM3355766  | Deletion - Frameshift  |
| 368            | c.1103_1154del                                                                                | p.K368Rfs*45 | COSM1738343  | Deletion - Frameshift  |
| 369            | c.1105_1138del                                                                                | p.E369Rfs*50 | COSM1738153  | Deletion - Frameshift  |
| 369            | c.1105_1148delinsAGGAGGCAGT                                                                   | p.E369Rfs*50 | COSM3355745  | Complex - frameshift   |
| 370            | c.1108_1144del                                                                                | p.E370Qfs*48 | COSM1738361  | Deletion - Frameshift  |
| 370            | c.1109_1160del                                                                                | p.E370Vfs*43 | COSM6022228  | Deletion - Frameshift  |
| 371            | c.1111_1141del                                                                                | p.E371Rfs*49 | COSM1738349  | Deletion - Frameshift  |
| 371            | c.1112_1142del                                                                                | p.E371Gfs*49 | COSM5703407  | Deletion - Frameshift  |
| 373            | c.1116del                                                                                     | p.D373Tfs*57 | COSM6506477  | Deletion - Frameshift  |
| 373            | c.?                                                                                           | p.D373Xfs*?  | COSM9312386  | Deletion - Frameshift  |
| 374            | c.1120_1125delinsTGCGT                                                                        | p.K374Cfs*56 | COSM3355758  | Complex - frameshift   |
| 374            | c.1120_1126delinsTACGTA                                                                       | p.K374Yfs*56 | COSM3355765  | Complex - frameshift   |
| 374            | c.1122_1125del                                                                                | p.K374Nfs*55 | COSM1738328  | Deletion - Frameshift  |
| 375            | c.1122del                                                                                     | p.K375Nfs*55 | COSM1738350  | Deletion - Frameshift  |
| 375            | c.1123_1133delinsTGCG                                                                         | p.K375Cfs*53 | COSM9264991  | Complex - frameshift   |
| 375            | c.1123_1144del                                                                                | p.K375Qfs*48 | COSM5703406  | Deletion - Frameshift  |
| 375            | c.1124_1133del                                                                                | p.K375Rfs*52 | COSM1738366  | Deletion - Frameshift  |
| 375            | c.1125del                                                                                     | p.K375Nfs*55 | COSM5885245  | Deletion - Frameshift  |
| 376            | c.1127_1129delinsTTTGC                                                                        | p.R376Lfs*55 | COSM1738363  | Complex - frameshift   |
| 377            | c.1129_1135delinsCTTTGCGTA                                                                    | p.K377Lfs*54 | COSM5885110  | Complex - frameshift   |
| 378            | c.?                                                                                           | p.E378Xfs*45 | COSM6834816  | Deletion - Frameshift  |
| 379            | c.1135_1147del                                                                                | p.E379Rfs*47 | COSM4745635  | Deletion - Frameshift  |
| 379            | c.1135_1152delinsCCTCCTCTTTGTCT                                                               | p.E379Pfs*50 | COSM1738352  | Complex - frameshift   |
| 379            | c.1136del                                                                                     | p.E379Gfs*51 | COSM9264994  | Deletion - Frameshift  |
| 379            | c.1137_1154delinsCCATCCTTGTC                                                                  | p.E379Dfs*49 | COSM1738353  | Complex - frameshift   |
| 380            | c.1138_1212delinsAGGAGGCAGAGGACAAGGAGGATGATGAGGACAAAGATGAGGATGAGGAGGATGAGGAGGACAAGGAGGAAGATGA | p.E380Rfs*62 | COSM5968696  | Complex - frameshift   |
| 380            | c.1139_1140insTC                                                                              | p.E380Dfs*51 | COSM3355767  | Insertion - Frameshift |
| 380            | c.1139_1215delinsCAAGGAGGATGATGAGGACAAAGATGAGGATGAGGAGGATGAGGAGGACAAGGAGGAAGTTGA              | p.E380Afs*57 | COSM7338412  | Complex - frameshift   |
| 380            | c.1139del                                                                                     | p.E380Gfs*50 | COSM5885111  | Deletion - Frameshift  |
| 382            | c.1144_1220delinsCAGAGGACAAGGAGGATGATGAGGACAAAGATGAAGATGAGGAGGATGAGGAGGACAAGGAGGAAGATG        | p.A382Qfs*57 | COSM3355735  | Complex - frameshift   |
| 384            | c.1150_1153delinsTTGTCTCTCTCTGCCTC                                                            | p.D384Lfs*51 | COSM5885112  | Complex - frameshift   |
| 384            | c.1151_1154delinsGCAATTGTC                                                                    | p.D384Gfs*48 | COSM3355746  | Complex - frameshift   |
| 384            | c.1151_1154delinsTATGTC                                                                       | p.D384Vfs*47 | COSM3355768  | Complex - frameshift   |
| 385            | c.1153_1154delinsTGTC                                                                         | p.K385Cfs*46 | COSM1738330  | Complex - frameshift   |
| 385            | c.1154_1155insTTGTC                                                                           | p.K385Nfs*47 | COSM1738056  | Insertion - Frameshift |
| 385            | c.1154delinsCTTGTC                                                                            | p.K385Tfs*47 | COSM1738331  | Complex - frameshift   |
| 385            | c.1154delinsTGTGTC                                                                            | p.K385Mfs*47 | COSM1738155  | Complex - frameshift   |
| 385            | c.1154delinsTTTGTC                                                                            | p.K385Ifs*47 | COSM1738356  | Complex - frameshift   |
| 386            | c.1154_1155insATGTC                                                                           | p.E386Cfs*46 | COSM1738355  | Insertion - Frameshift |
| 386            | c.1155_1156insTGTCG                                                                           | p.E386Cfs*46 | COSM1738332  | Insertion - Frameshift |
| 387            | c.1157_1158dup                                                                                | p.D387Rfs*44 | COSM9264993  | Insertion - Frameshift |
| 387            | c.1159_1177del                                                                                | p.D387Rfs*37 | COSM5967353  | Deletion - Frameshift  |
| 402            | c.1204_1252del                                                                                | p.E402Rfs*12 | COSM10202580 | Insertion - Frameshift |
| 413            | c.1227_1231del                                                                                | p.A413Gfs*27 | COSM9269787  | Deletion - Frameshift  |

\* Mutations were extracted from the Catalogue Of Somatic Mutations In Cancer (COSMIC) and the positions of mutations were expressed in accordance with the accession No. NM\_004343.3. Sorting was conducted under the following conditions: Tissue; Hematopoietic neoplasm and Myelofibrosis, Somatic status; Confirmed somatic and Variant of unknown origin, and Sample type; Tumor sample. Only frameshift mutations are shown in this list.

**Supplementary Table S4. List of non-canonical mutations in driver genes.\***

| Gene | position in GRCh38   | CDS Mutation          | AA Mutation         | COSMIC ID   | disease | Type                    |
|------|----------------------|-----------------------|---------------------|-------------|---------|-------------------------|
| JAK2 | 9:5054790..5054790   | c.842G>A              | p.G281D             | COSM1757320 | PV      | Substitution - Missense |
| JAK2 | 9:5072585..5072585   | c.1735C>T             | p.L579F             | COSM29111   | PV      | Substitution - Missense |
| JAK2 | 9:5073752..5073752   | c.1831T>G             | p.L611V             | COSM51411   | PV      | Substitution - Missense |
| JAK2 | 9:5073753..5073753   | c.1832T>C             | p.L611S             | COSM21361   | PV      | Substitution - Missense |
| JAK2 | 9:5073764..5073764   | c.1843G>C             | p.V615L             | COSM7410093 | PV      | Substitution - Missense |
| JAK2 | na                   | c.?                   | p.V615L             | COSM4166522 | PV      | Substitution - Missense |
| JAK2 | na                   | c.?                   | p.C616Y             | COSM25862   | PV      | Substitution - Missense |
| JAK2 | 9:5073770..5073770   | c.1849G>A             | p.V617I             | COSM29117   | PV      | Substitution - Missense |
| JAK2 | 9:5073770..5073773   | c.1849_1852delinsTTCC | p.V617_C618delinsFR | COSM29821   | PV      | Substitution - Missense |
| JAK2 | 9:5073770..5073773   | c.1849_1852delinsTTTC | p.V617_C618delinsFR | COSM27624   | PV      | Substitution - Missense |
| JAK2 | 9:5073773..5073773   | c.1852T>C             | p.C618R             | COSM29118   | PV      | Substitution - Missense |
| JAK2 | 9:5073781..5073781   | c.1860C>A             | p.D620E             | COSM27063   | PV      | Substitution - Missense |
| JAK2 | na                   | c.?                   | p.I724T             | COSM5967236 | PV      | Substitution - Missense |
| JAK2 | 9:5089783..5089783   | c.2681A>G             | p.D894G             | COSM327225  | PV      | Substitution - Missense |
| JAK2 | 9:5126715..5126715   | c.3323A>G             | p.N1108S            | COSM33708   | PV      | Substitution - Missense |
| JAK2 | 9:5073770..5073770   | c.1849G>A             | p.V617I             | COSM29117   | ET      | Substitution - Missense |
| JAK2 | 9:5073774..5073774   | c.1853G>T             | p.C618F             | COSM51410   | ET      | Substitution - Missense |
| JAK2 | 9:5077468..5077468   | c.1880A>C             | p.E627A             | COSM7409717 | ET      | Substitution - Missense |
| JAK2 | 9:5078360..5078360   | c.2047A>G             | p.R683G             | COSM29300   | ET      | Substitution - Missense |
| JAK2 | 9:5089701..5089701   | c.2599C>T             | p.R867W             | COSM7409821 | ET      | Substitution - Missense |
| JAK2 | 9:5089702..5089702   | c.2600G>A             | p.R867Q             | COSM303856  | ET      | Substitution - Missense |
| JAK2 | na                   | c.?                   | p.Y317H             | COSM6834815 | MF      | Substitution - Missense |
| JAK2 | 9:5073753..5073753   | c.1832T>C             | p.L611S             | COSM21361   | MF      | Substitution - Missense |
| JAK2 | 9:5073769..5073770   | c.1848_1849delinsCT   | p.V617F             | COSM25834   | MF      | Substitution - Missense |
| JAK2 | 9:5081727..5081727   | c.2437T>G             | p.Y813D             | COSM33707   | MF      | Substitution - Missense |
| JAK2 | 9:5081736..5081738   | c.2446_2448del        | p.L816del           | COSM7409990 | MF      | Deletion - In frame     |
| MPL  | 1:43337858..43337858 | c.10T>C               | p.W4R               | COSM909746  | ET      | Substitution - Missense |
| MPL  | na                   | c.?                   | p.P70L              | COSM5967233 | ET      | Substitution - Missense |
| MPL  | 1:43338685..43338685 | c.356C>T              | p.T119I             | COSM5369881 | ET      | Substitution - Missense |
| MPL  | 1:43339490..43339490 | c.611C>T              | p.S204F             | COSM28996   | ET      | Substitution - Missense |
| MPL  | 1:43339568..43339568 | c.689A>G              | p.E230G             | COSM5369882 | ET      | Substitution - Missense |
| MPL  | na                   | c.?                   | p.Y252H             | COSM8630581 | ET      | Substitution - Missense |

|     |                      |                            |                     |              |    |                            |
|-----|----------------------|----------------------------|---------------------|--------------|----|----------------------------|
| MPL | 1:43346476..43346476 | c.1012G>C                  | p.E338Q             | COSM7409827  | ET | Substitution - Missense    |
| MPL | 1:43349288..43349289 | c.1494_1495insGTGATCGCTCTG | p.L498_H499insVIAL  | COSM142847   | ET | Insertion - In frame       |
| MPL | 1:43349296..43349296 | c.1502T>C                  | p.V501A             | COSM86964    | ET | Substitution - Missense    |
| MPL | na                   | c.?                        | p.V501A             | COSM5885103  | ET | Substitution - Missense    |
| MPL | 1:43349307..43349307 | c.1513A>T                  | p.S505C             | COSM86963    | ET | Substitution - Missense    |
| MPL | 1:43349308..43349308 | c.1514G>A                  | p.S505N             | COSM27286    | ET | Substitution - Missense    |
| MPL | 1:43349319..43349319 | c.1525G>T                  | p.G509C             | COSM43211    | ET | Substitution - Missense    |
| MPL | na                   | c.?                        | p.R514_P518>K       | COSM10046171 | ET | Complex - deletion inframe |
| MPL | 1:43349336..43349338 | c.1542_1544delinsAGC       | p.W515A             | COSM29009    | ET | Substitution - Missense    |
| MPL | 1:43349337..43349337 | c.1543T>A                  | p.W515R             | COSM29008    | ET | Substitution - Missense    |
| MPL | 1:43349337..43349338 | c.1543_1544delinsGC        | p.W515A             | COSM27289    | ET | Substitution - Missense    |
| MPL | 1:43349337..43349340 | c.1543_1546delinsAGGG      | p.W515_Q516delinsRE | COSM9571856  | ET | Substitution - Missense    |
| MPL | na                   | c.?                        | p.W515A             | COSM41267    | ET | Substitution - Missense    |
| MPL | na                   | c.?                        | p.W515R             | COSM41266    | ET | Substitution - Missense    |
| MPL | na                   | c.?                        | p.W515S             | COSM5885102  | ET | Substitution - Missense    |
| MPL | na                   | c.?                        | p.W515X             | COSM29616    | ET | Substitution - Missense    |
| MPL | 1:43349340..43349340 | c.1546C>G                  | p.Q516E             | COSM7409610  | ET | Substitution - Missense    |
| MPL | 1:43352635..43352635 | c.1771T>G                  | p.Y591D             | COSM28997    | ET | Substitution - Missense    |
| MPL | 1:43339489..43339489 | c.610T>C                   | p.S204P             | COSM26072    | MF | Substitution - Missense    |
| MPL | 1:43339490..43339490 | c.611C>T                   | p.S204F             | COSM28996    | MF | Substitution - Missense    |
| MPL | na                   | c.?                        | p.S204P             | COSM5369880  | MF | Substitution - Missense    |
| MPL | 1:43349296..43349296 | c.1502T>C                  | p.V501A             | COSM86964    | MF | Substitution - Missense    |
| MPL | na                   | c.?                        | p.V501A             | COSM5885103  | MF | Substitution - Missense    |
| MPL | 1:43349308..43349308 | c.1514G>A                  | p.S505N             | COSM27286    | MF | Substitution - Missense    |
| MPL | 1:43349310..43349310 | c.1516G>A                  | p.A506T             | COSM27287    | MF | Substitution - Missense    |
| MPL | 1:43349323..43349323 | c.1529T>C                  | p.L510P             | COSM27288    | MF | Substitution - Missense    |
| MPL | 1:43349333..43349334 | c.1539_1540insCTGAGCTGCCTG | p.L513_R514insLSCL  | COSM133104   | MF | Insertion - In frame       |
| MPL | 1:43349337..43349337 | c.1543T>A                  | p.W515R             | COSM29008    | MF | Substitution - Missense    |
| MPL | 1:43349337..43349337 | c.1543T>C                  | p.W515R             | COSM43212    | MF | Substitution - Missense    |
| MPL | 1:43349337..43349338 | c.1543_1544delinsGC        | p.W515A             | COSM27289    | MF | Substitution - Missense    |
| MPL | na                   | c.?                        | p.W515A             | COSM41267    | MF | Substitution - Missense    |
| MPL | na                   | c.?                        | p.W515R             | COSM41266    | MF | Substitution - Missense    |

|      |                       |                |                |             |    |                         |
|------|-----------------------|----------------|----------------|-------------|----|-------------------------|
| MPL  | na                    | c.?            | p.W515S        | COSM5885102 | MF | Substitution - Missense |
| MPL  | na                    | c.?            | p.W515X        | COSM29616   | MF | Substitution - Missense |
| MPL  | 1:43349349..43349349  | c.1555G>A      | p.A519T        | COSM27290   | MF | Substitution - Missense |
| MPL  | na                    | c.?            | p.P565L        | COSM5982018 | MF | Substitution - Missense |
| MPL  | 1:43352639..43352639  | c.1775G>A      | p.R592Q        | COSM2170465 | MF | Substitution - Missense |
| MPL  | 1:43352734..43352734  | c.1870C>G      | p.H624D        | COSM166674  | MF | Substitution - Missense |
| CALR | 19:12943753..12943753 | c.1094A>T      | p.Q365L        | COSM5037723 | ET | Substitution - Missense |
| CALR | 19:12943758..12943758 | c.1099C>A      | p.L367I        | COSM4385867 | ET | Substitution - Missense |
| CALR | 19:12943762..12943762 | c.1103A>G      | p.K368R        | COSM4385870 | ET | Substitution - Missense |
| CALR | 19:12943762..12943762 | c.1103A>T      | p.K368M        | COSM3733224 | ET | Substitution - Missense |
| CALR | 19:12943767..12943767 | c.1108G>T      | p.E370*        | COSM6506475 | ET | Substitution - Nonsense |
| CALR | 19:12943771..12943771 | c.1112A>G      | p.E371G        | COSM4385872 | ET | Substitution - Missense |
| CALR | 19:12943772..12943772 | c.1113A>C      | p.E371D        | COSM1738336 | ET | Substitution - Missense |
| CALR | 19:12943772..12943819 | c.1113_1160del | p.E371_E386del | COSM5037718 | ET | Deletion - In frame     |
| CALR | 19:12943773..12943773 | c.1114G>T      | p.E372*        | COSM4385869 | ET | Substitution - Nonsense |
| CALR | 19:12943783..12943783 | c.1124A>G      | p.K375R        | COSM4385863 | ET | Substitution - Missense |
| CALR | 19:12943788..12943799 | c.1129_1140del | p.K377_E380del | COSM9180738 | ET | Deletion - In frame     |
| CALR | 19:12943801..12943801 | c.1142A>C      | p.E381A        | COSM9565930 | ET | Substitution - Missense |
| CALR | 19:12943811..12943816 | c.1152_1157del | p.D384_K385del | COSM9180540 | ET | Deletion - In frame     |
| CALR | 19:12943815..12943815 | c.1156G>T      | p.E386*        | COSM4385865 | ET | Substitution - Nonsense |
| CALR | 19:12943824..12943824 | c.1165G>T      | p.E389*        | COSM4385871 | ET | Substitution - Nonsense |
| CALR | 19:12943874..12943874 | c.1215G>T      | p.E405D        | COSM9565931 | ET | Substitution - Missense |
| CALR | 19:12943732..12943732 | c.1073A>G      | p.K358R        | COSM4385861 | MF | Substitution - Missense |
| CALR | 19:12943752..12943752 | c.1093C>G      | p.Q365E        | COSM4385858 | MF | Substitution - Missense |
| CALR | 19:12943752..12943802 | c.1093_1143del | p.Q365_E381del | COSM4385855 | MF | Deletion - In frame     |
| CALR | 19:12943765..12943765 | c.1106A>G      | p.E369G        | COSM4385864 | MF | Substitution - Missense |
| CALR | 19:12943777..12943777 | c.1118A>G      | p.D373G        | COSM4385866 | MF | Substitution - Missense |
| CALR | 19:12943779..12943779 | c.1120A>C      | p.K374Q        | COSM6506476 | MF | Substitution - Missense |
| CALR | 19:12943780..12943780 | c.1121A>G      | p.K374R        | COSM3720638 | MF | Substitution - Missense |
| CALR | 19:12943782..12943782 | c.1123A>G      | p.K375E        | COSM4385859 | MF | Substitution - Missense |
| CALR | 19:12943796..12943796 | c.1137G>C      | p.E379D        | COSM3720629 | MF | Substitution - Missense |
| CALR | 19:12943801..12943801 | c.1142A>G      | p.E381G        | COSM3720630 | MF | Substitution - Missense |
| CALR | 19:12943811..12943811 | c.1152C>G      | p.D384E        | COSM4385857 | MF | Substitution - Missense |

|      |                       |                |                |             |    |                         |
|------|-----------------------|----------------|----------------|-------------|----|-------------------------|
| CALR | 19:12943812..12943812 | c.1153A>G      | p.K385E        | COSM9264992 | MF | Substitution - Missense |
| CALR | 19:12943820..12943867 | c.1161_1208del | p.D387_E402del | COSM5885079 | MF | Deletion - In frame     |
| CALR | 19:12943834..12943834 | c.1175A>G      | p.D392G        | COSM4385856 | MF | Substitution - Missense |
| CALR | 19:12943850..12943858 | c.1191_1199del | p.E398_D400del | COSM5715390 | MF | Deletion - In frame     |

\* Mutations were extracted from Catalogue Of Somatic Mutations In Cancer (COSMIC) and the positions of mutations were expressed in accordance with the accession Nos. NM\_004972.3 for *JAK2*, NM\_005373.2 for *MPL*, and NM\_004343.3 for *CALR*. Sorting was conducted under the following conditions: Tissue; Hematopoietic neoplasm and Polycythemia vera, Essential thrombocythemia, or Myelofibrosis, Somatic status; Confirmed somatic and Variant of unknown origin, and Sample type; Tumor sample. Silent mutations are removed from the list.
